# Supplementary material for: Computational Studies on the Molecule 1-(2-Hydroxyethyl)-5-Fluorouracil in Gas Phase and Aqueous Solution and Prediction of Its Confinement inside Capped Nanotubes
Source: Hindawi journal article supplement (doi:10.1155/2019/1706926), 2019-08-04
Supplement: f1 [file 1706926.f1.docx]

Supplementary materials

Supplementary material S1: Standard enthalpy (KJ/mol), Gibbs free energy , and entropy of the studied molecule at temperatures in the range of 50-950 K.

| Temperature (K) | 50 | 100 | 150 | 200 | 250 | 298.15 | 300 | 350 | 400 | 450 |
| --- | --- | --- | --- | --- | --- | --- | --- | --- | --- | --- |
|  | 371.175  358.452  254.460 | 374.467  344.552  299.150 | 379.009  328.665  335.627 | 384.806  311.043  368.815 | 391.816  291.816  400.000 | 399.675  271.860  428.694 | 399.998  271.064  429.780 | 409.308  248.855  458.437 | 419.681  225.239  486.105 | 431.044  200.260  512.855 |
| Temperature (K) | 500 | 550 | 600 | 650 | 700 | 750 | 800 | 850 | 900 | 950 |
|  | 443.308  173.968  538.680 | 456.391  146.408  563.605 | 470.209  117.622  587.645 | 484.691  87.658  610.820 | 499.767  56.556  633.159 | 515.383  24.357  654.701 | 531.488  -8.903  675.489 | 548.036  -43.182  695.551 | 564.992  -78.447  714.932 | 582.315  -114.663  733.661 |

Supplementary material S2: Enthalpy change , change of Gibbs free energy , entropy change , and stability constant *LogK* for the confinement reaction of the optimized hybrid nanostructures at temperatures in the range of 100−900 K.

| **Capped-SWCNT(12,0)** | | | | | | | | | | | | | | | | | |
| --- | --- | --- | --- | --- | --- | --- | --- | --- | --- | --- | --- | --- | --- | --- | --- | --- | --- |
| Temperature (K) | 100 | 200 | 298.15 | | 300 | | 400 | 500 | | 600 | | | 700 | 800 | | 900 | |
| LogK | −41.9013  −37.524  −43.775  0.189 | −41.635  −33.247  −41.939  0.084 | −41.354  −29.190  −40.799  0.049 | | −41.348  −29.115  −40.779  0.049 | | −41.039  −25.083  −39.891  0.032 | −40.712  −21.131  −39.160  0.021 | | −40.371  −17.246  −38.541  0.014 | | | −40.022  −13.420  −38.003  0.010 | −39.667  −9.644  −37.530  0.006 | | −39.310  −5.912  −37.108  0.003 | |
| **Capped-SWCNT(14,0)** | | | | | | | | | | | | | | | | | |
| Temperature (K) | 100 | 200 | | 298.15 | | 300 | 400 | | 500 | | 600 | 700 | | | 800 | | 900 |
| LogK | −37.867  −34.051  −38.165  0.171 | −37.495  −30.376  −35.595  0.076 | | −37.120  −26.962  −34.068  0.046 | | −37.113  −26.899  −34.044  0.045 | −36.730  −23.552  −32.944  0.030 | | −36.344  −20.303  −32.082  0.020 | | −35.958  −17.131  −31.377  0.014 | −35.570  −14.024  −30.780  0.010 | | | −35.183  −10.971  −30.264  0.007 | | −34.795  −7.969  −29.806  0.004 |
| **Capped-SWCNT(16,0)** | | | | | | | | | | | | | | | | | |
| Temperature (K) | 100 | 200 | | 298.15 | | 300 | 400 | | 500 | | 600 | 700 | | | 800 | | 900 |
| LogK | −31.129  −27.405  −37.243  0.138 | −30.813  −23.780  −35.068  0.060 | | −30.478  −20.427  −33.711  0.034 | | −30.471  −20.366  −33.685  0.034 | −30.118  −17.049  −32.671  0.0215 | | −29.755  −13.825  −31.861  0.014 | | −29.385  −10.673  −31.186  0.009 | −29.010  −7.583  −30.610  0.005 | | | −28.632  −4.549  −30.104  0.003 | | −28.251  −1.561  −29.655  0.001 |
